# Supplementary material for: The extent of carbon surface oxygen affinity and its effects on the activity of metal-free carbon catalysts in the oxygen reduction reaction: the interplay of porosity and N-, O- and S-enriched surface chemistry
Source: Royal Society of Chemistry journal article supplement (doi:10.1039/d2ma00762b), 2022-01-01
Supplement: d2ma00762b1.pdf [file d2ma00762b1.pdf]

SUPPLEMENTARY INFORMATION

**Extent of carbon surface oxygen affinity and its effects on the activity of metal-free carbon catalysts in oxygen reduction reaction: Interplay of porosity and N-, O- and S- enriched surface chemistry**

Marc Florent, Raabia Hashmi, Teresa J. Bandosz\*

Department of Chemistry and Biochemistry, The City College of The City University of New York, 160 Convent Avenue, New York, NY 10031, United States.

\*Corresponding author email address: [tbandosz@ccny.cuny.edu](mailto:tbandosz@ccny.cuny.edu)

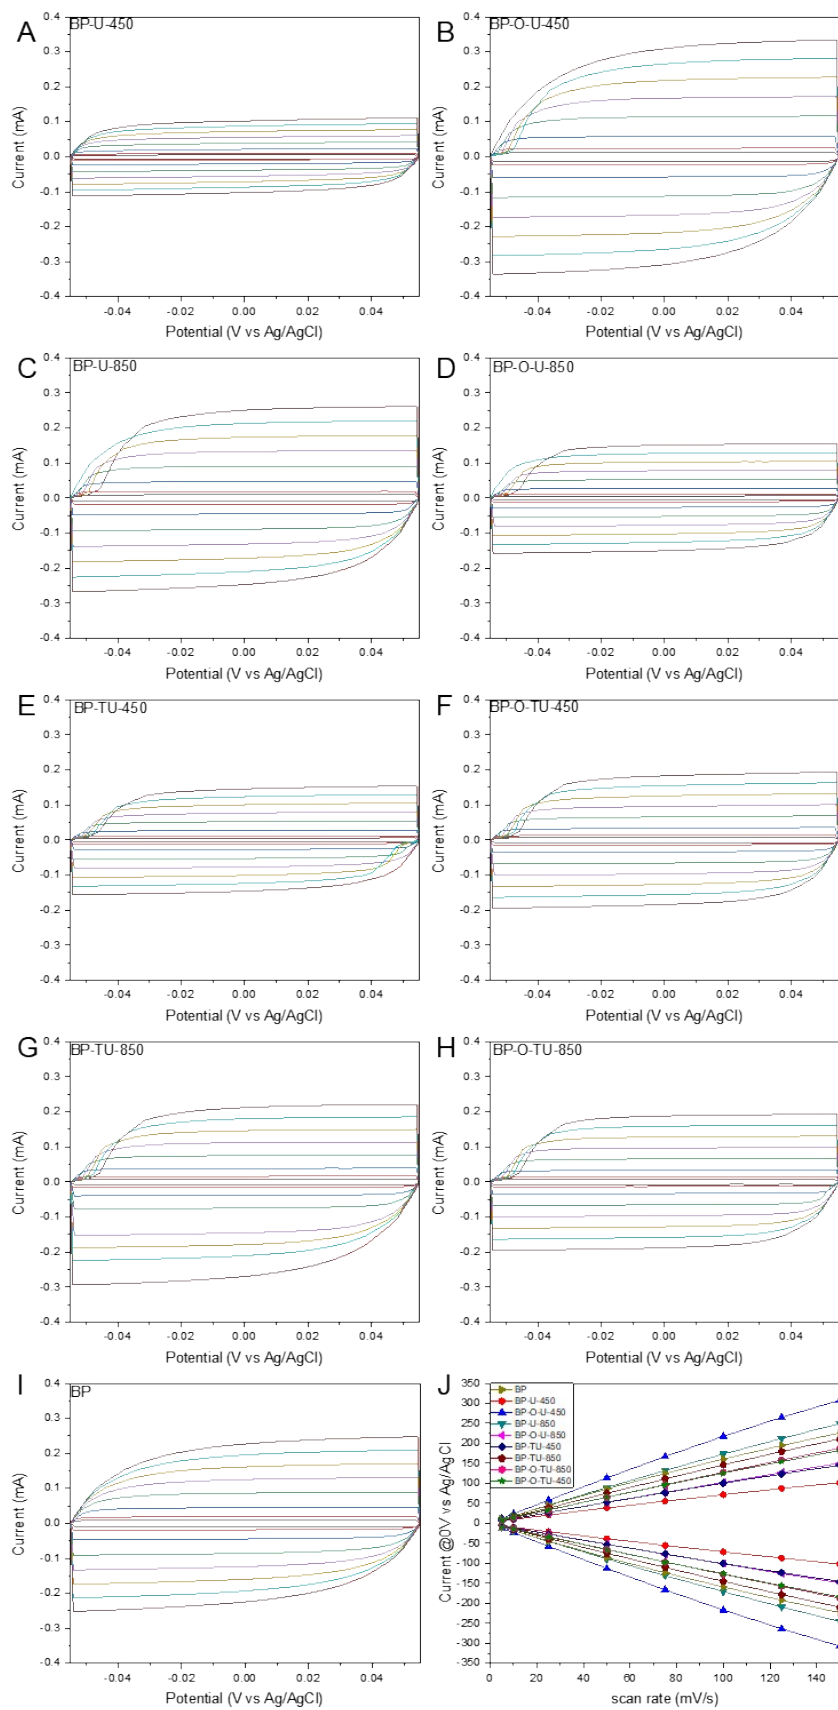

Figure S1. CV curves of measures with 5, 10, 25, 50, 75, 100, 125 and 150 mV/s scan rates; (J) Anodic ( $I_a$ ) and cathodic ( $I_c$ ) currents, at 0V as a function of the scan rate (v)

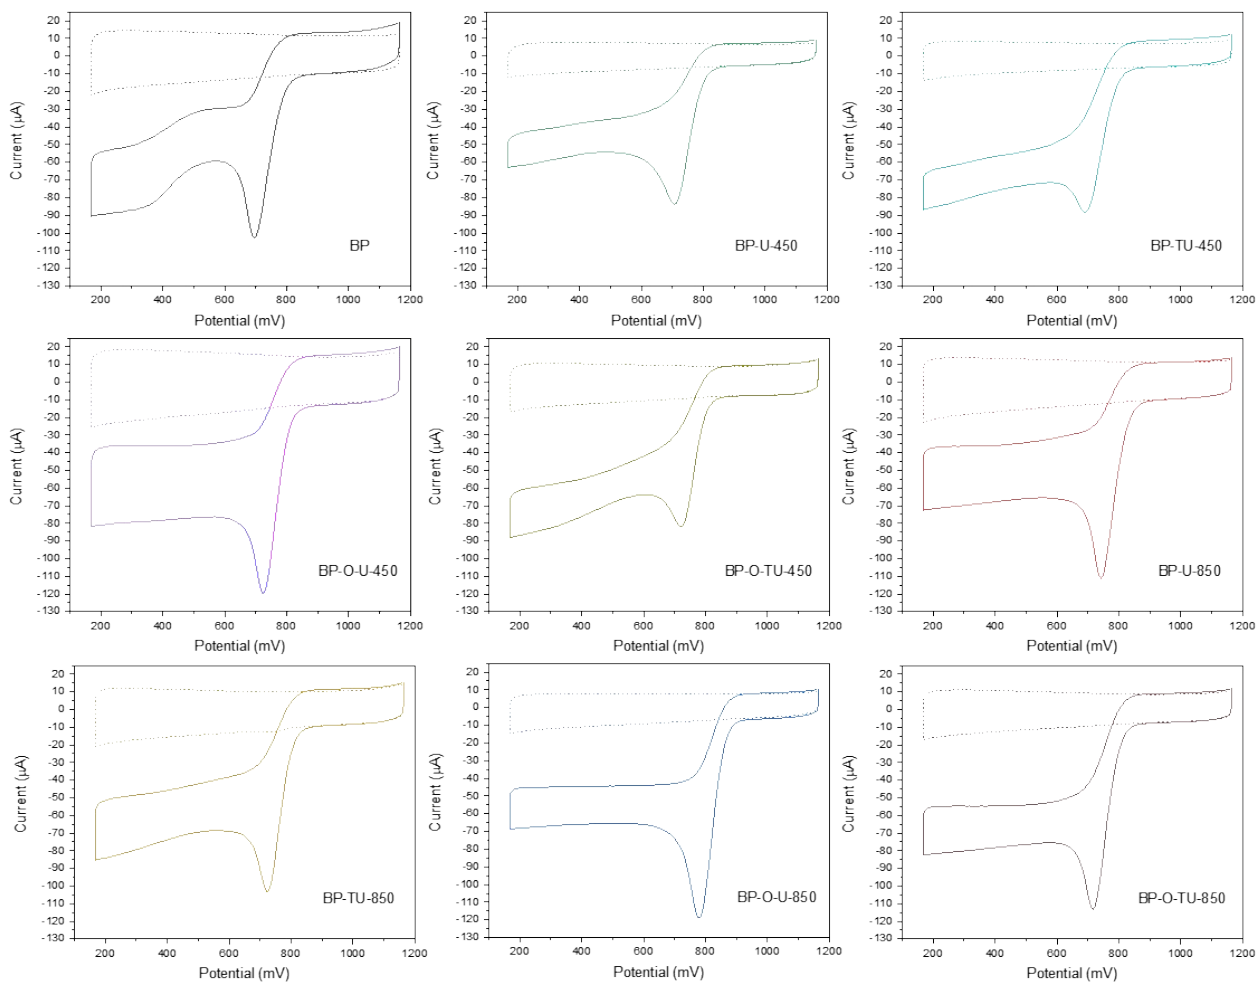

Figure S2. CV curves in  $N_2$  (thin lines) and in  $O_2$  (thick lines) saturated electrolytes

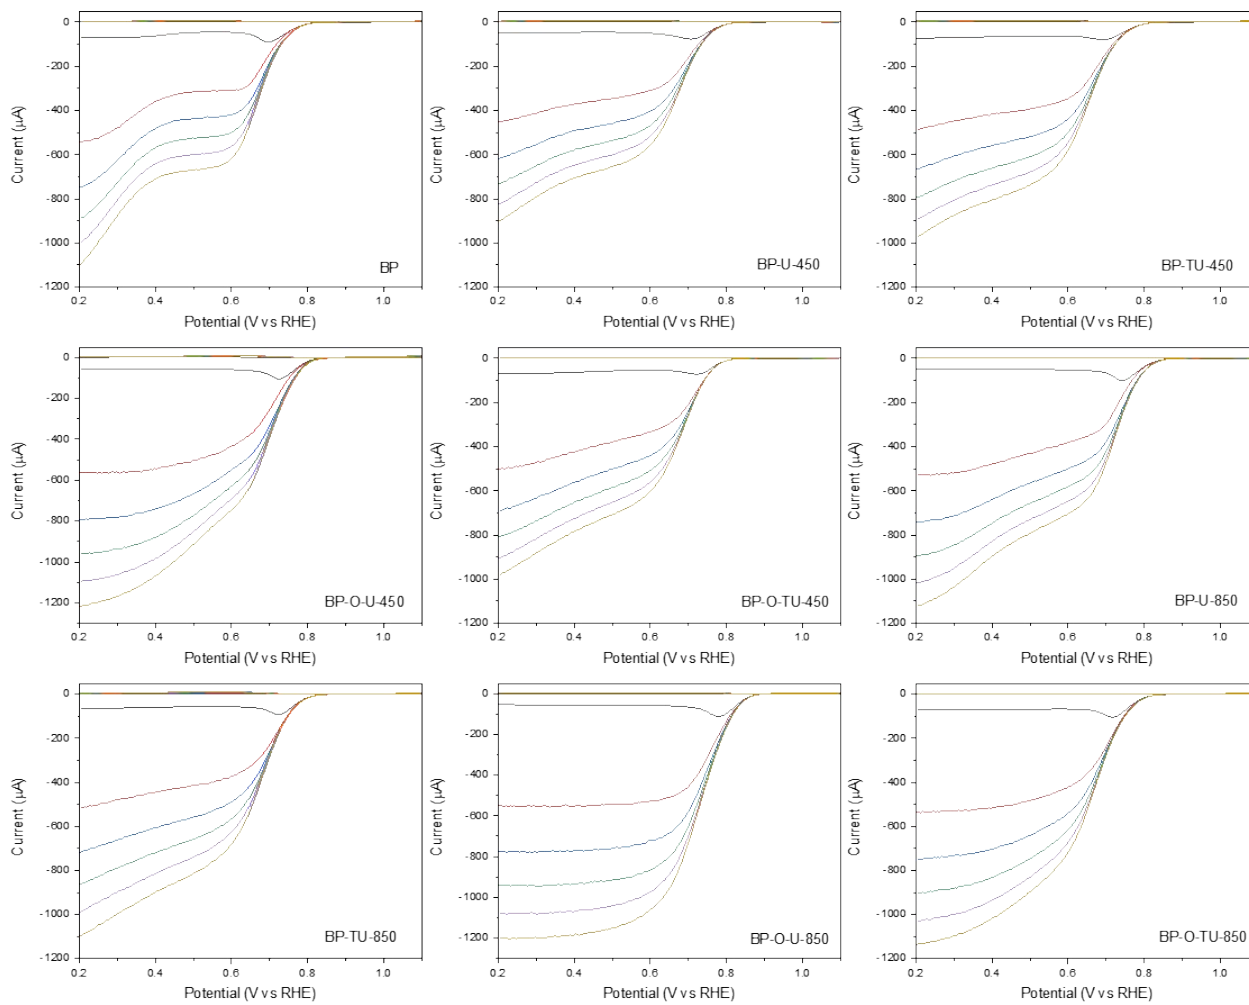

Figure S3. LSV curves at various rotation speeds (between 0 and 2000 rpm) of the different samples

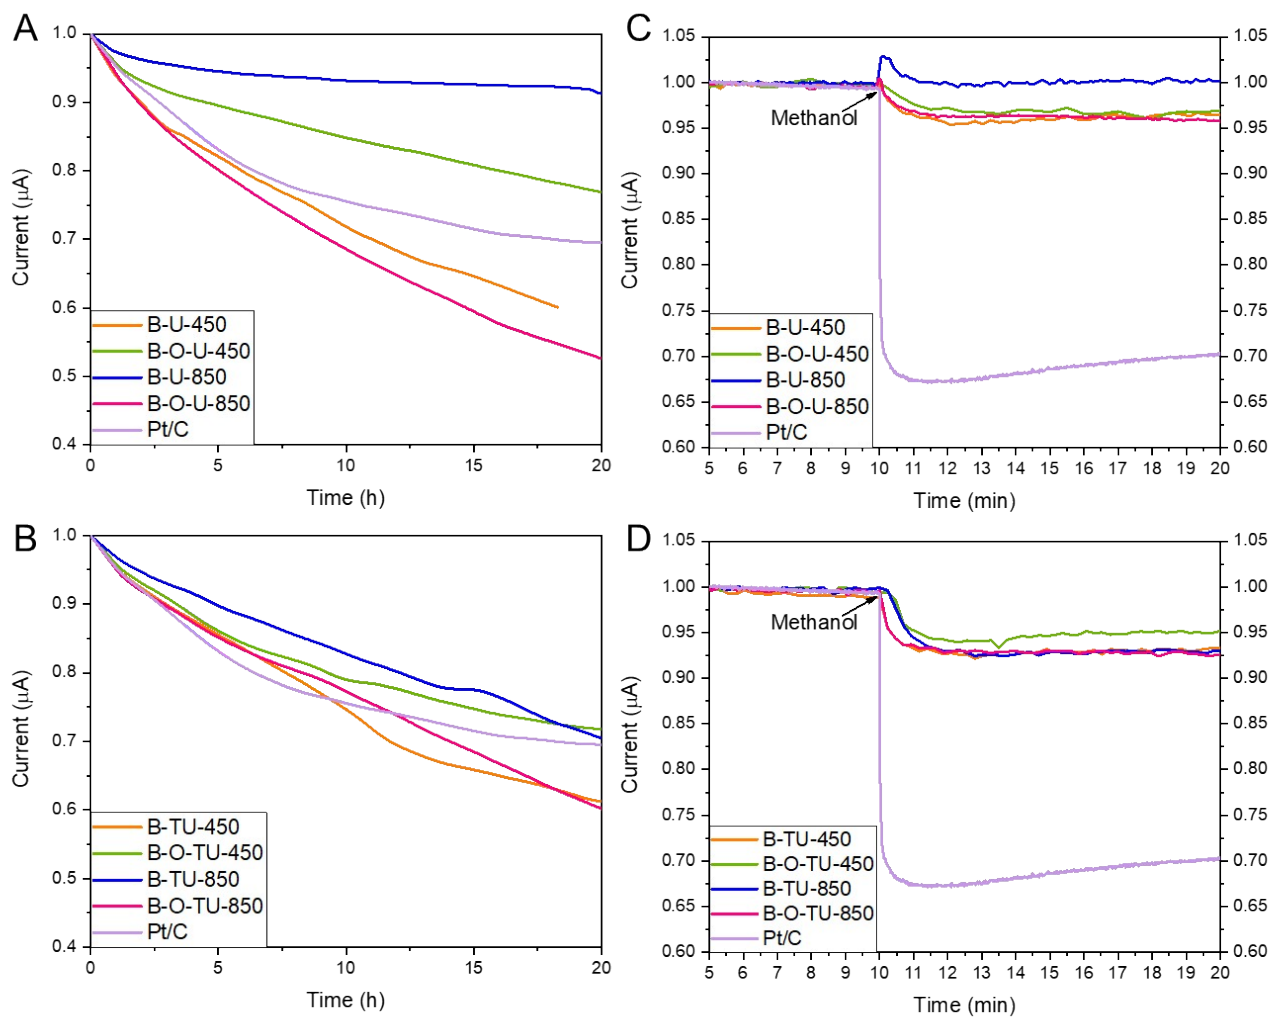

Figure S4. Stability of the catalytic performance for the urea-modified samples (A) and the thiourea-modified samples (B); resistance to methanol cross-over for the urea-modified samples (C) and the thiourea-modified samples (D).

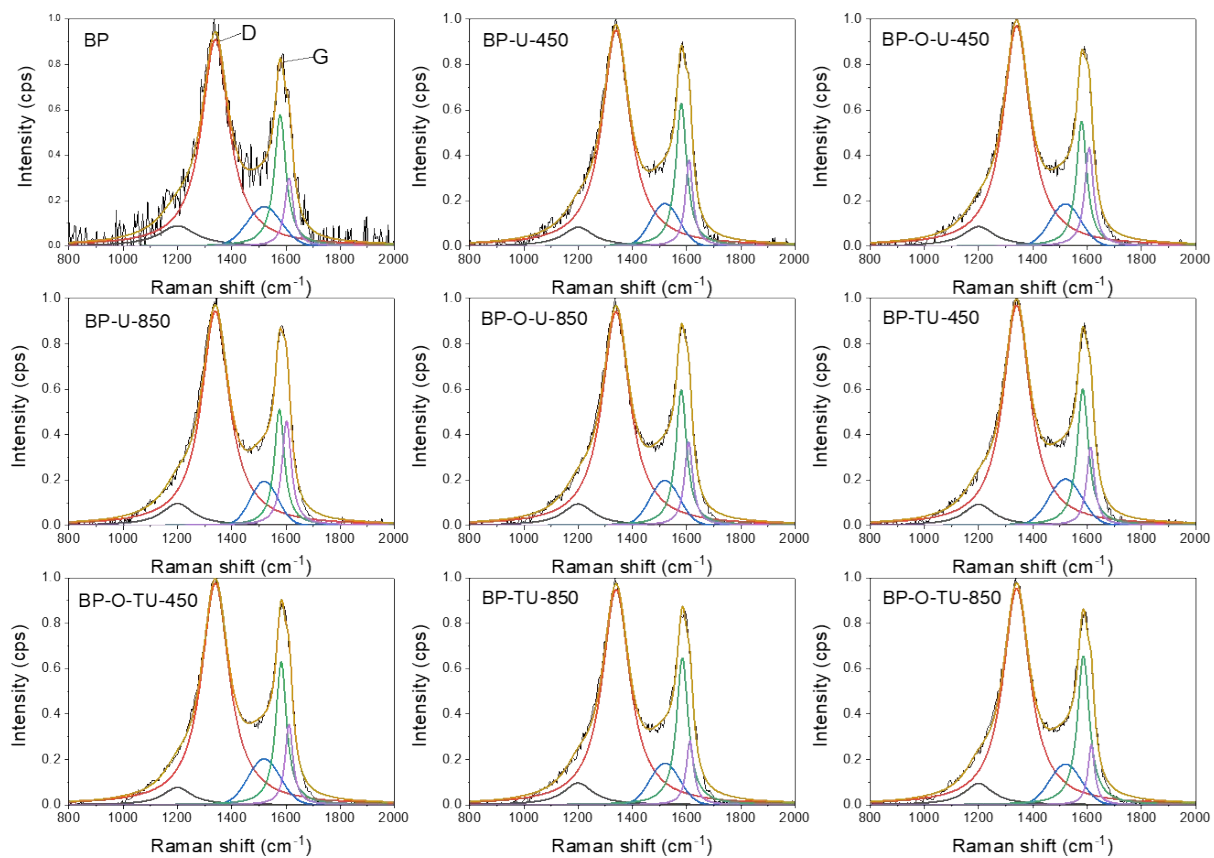

Figure S5. Raman spectra of the tested samples

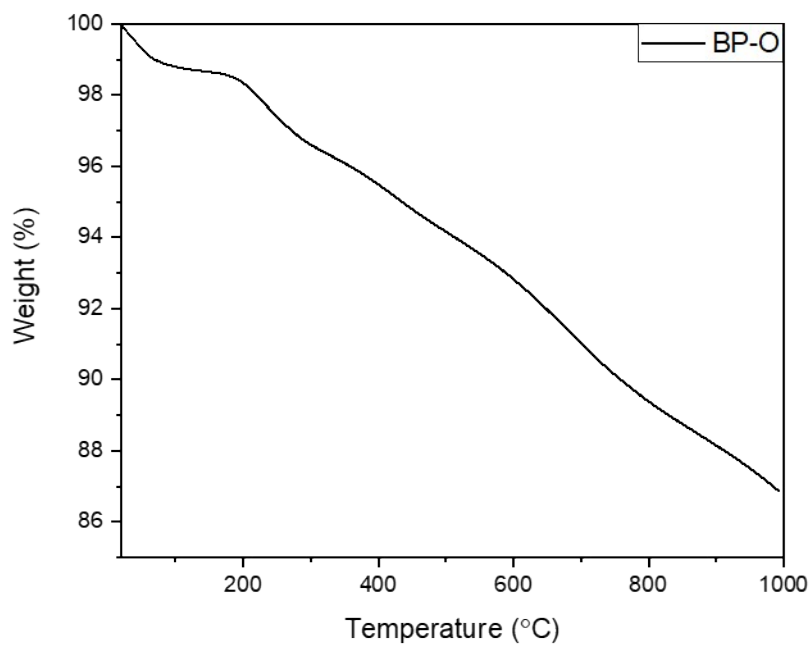

Figure S6. TG curve of the oxidized BP sample.

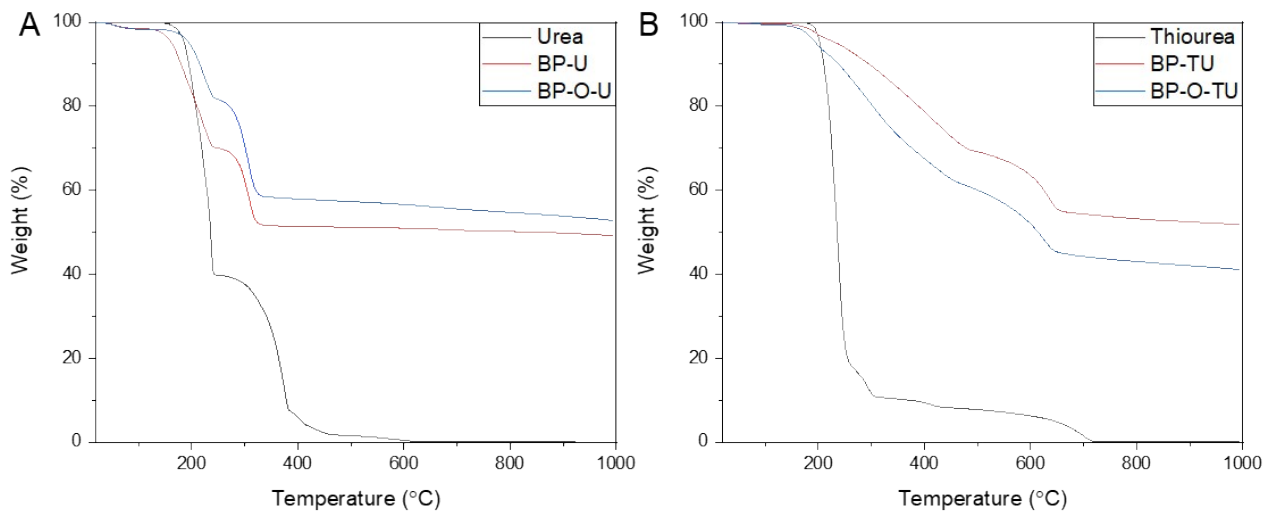

Figure S7. TG curves for urea and BP and its oxidized counterpart BP-O impregnated with urea (A) and thiourea and BP, and BP-O impregnated with thiourea (B).

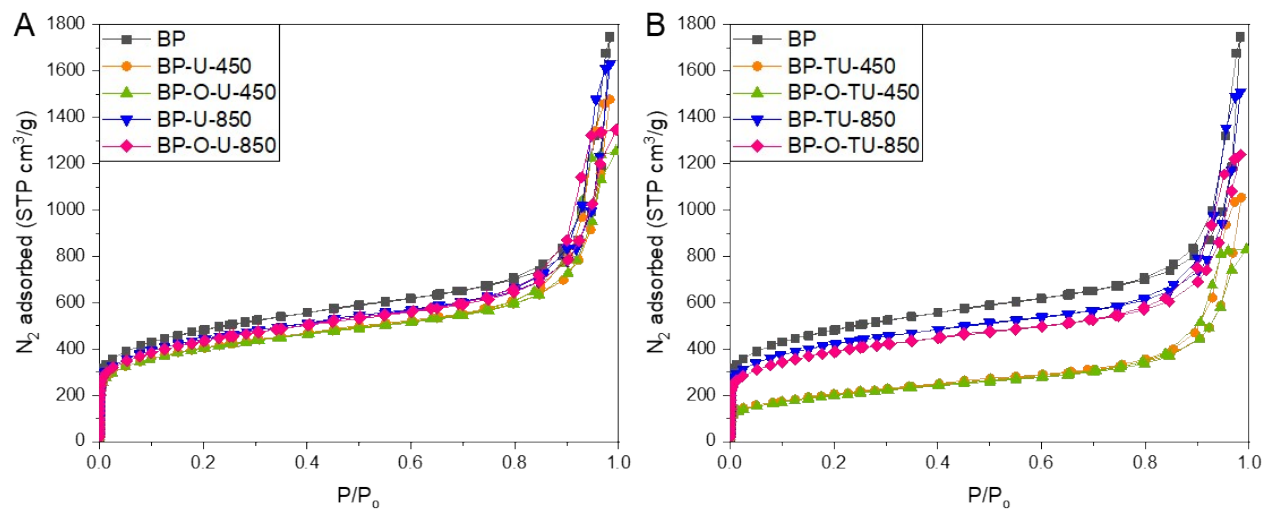

Figure S8. Nitrogen adsorption isotherms for the urea-modified samples (A) and thiourea-modified ones (B).

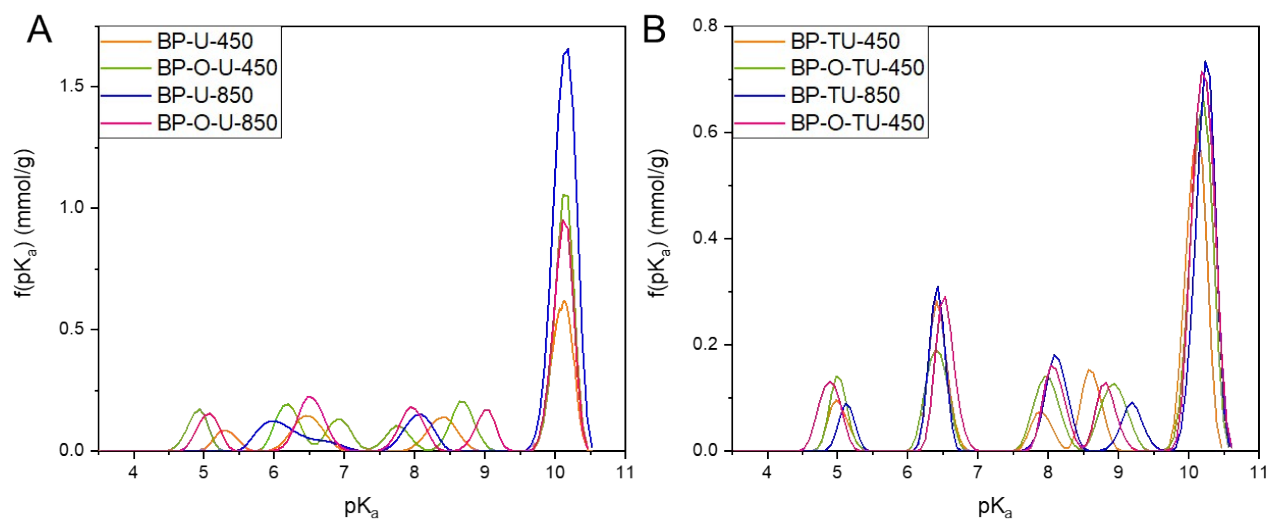

Figure S9.  $pK_a$  distribution of the dissociating groups on the surface of the urea-modified samples (A) and thiourea-modified ones (B).



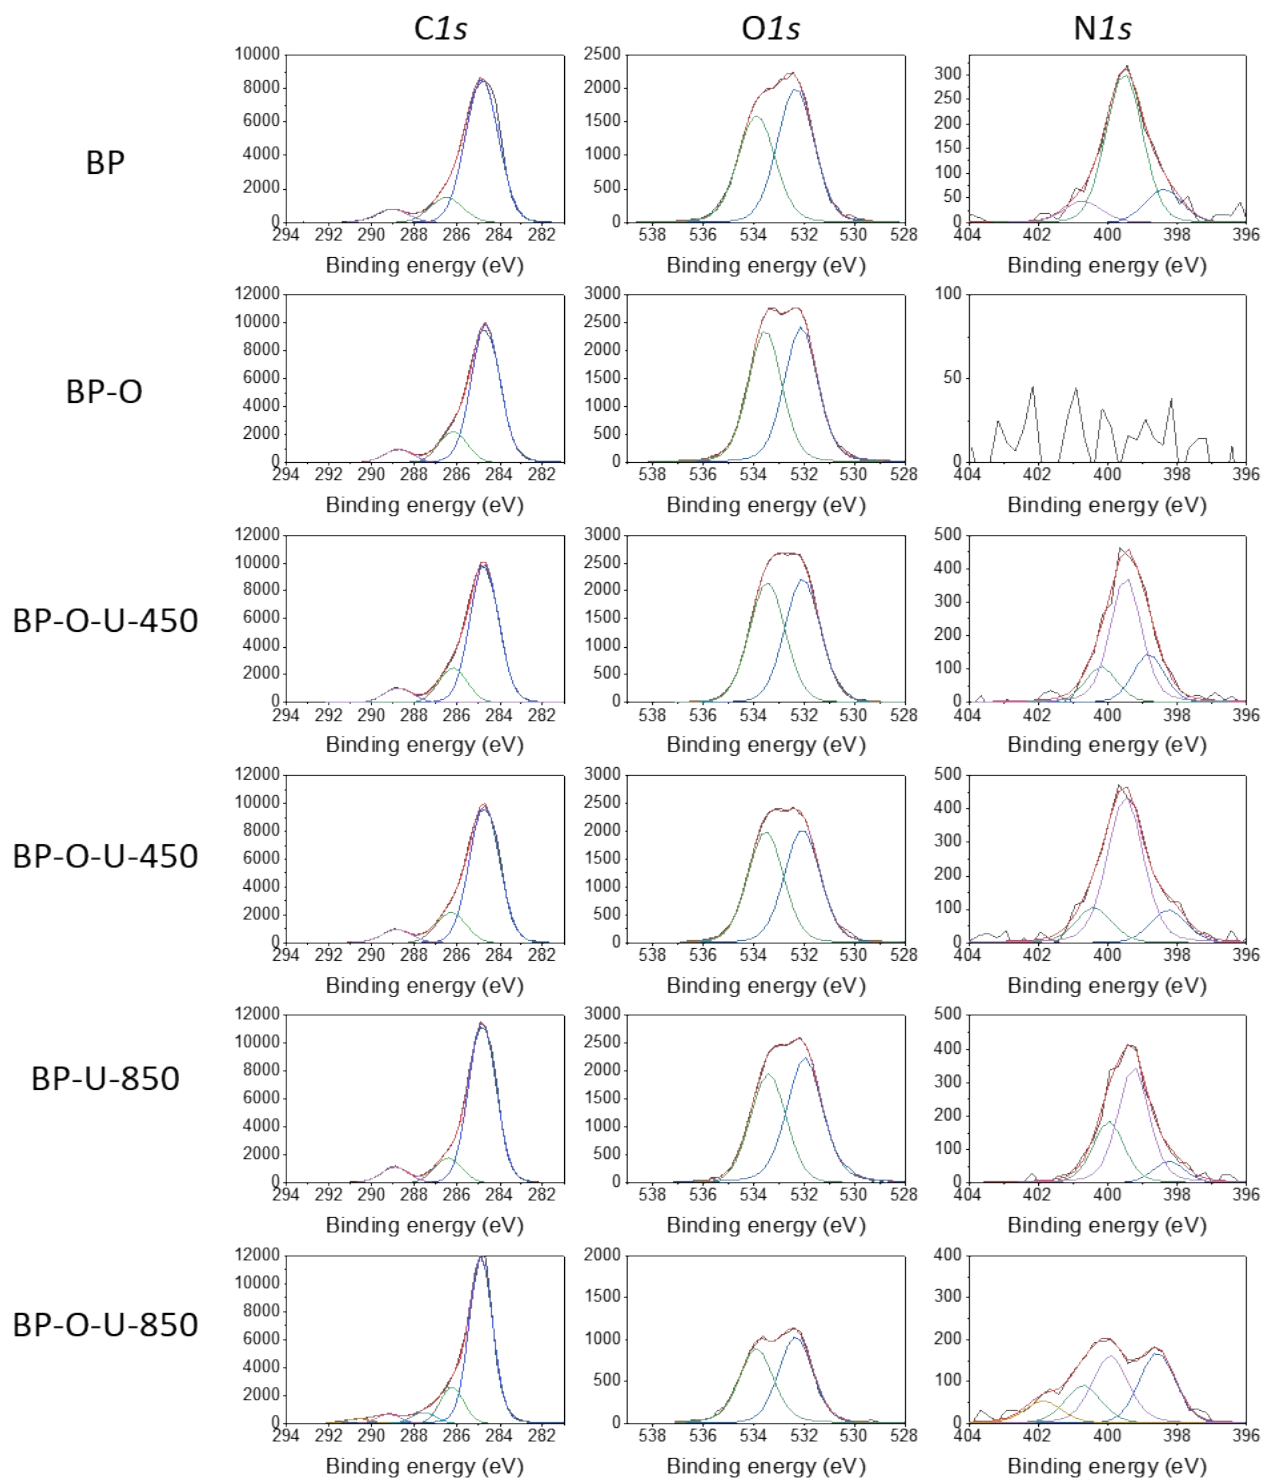

Figure S10. Deconvolution of C 1s, O 1s and N 1s for the series of urea samples.

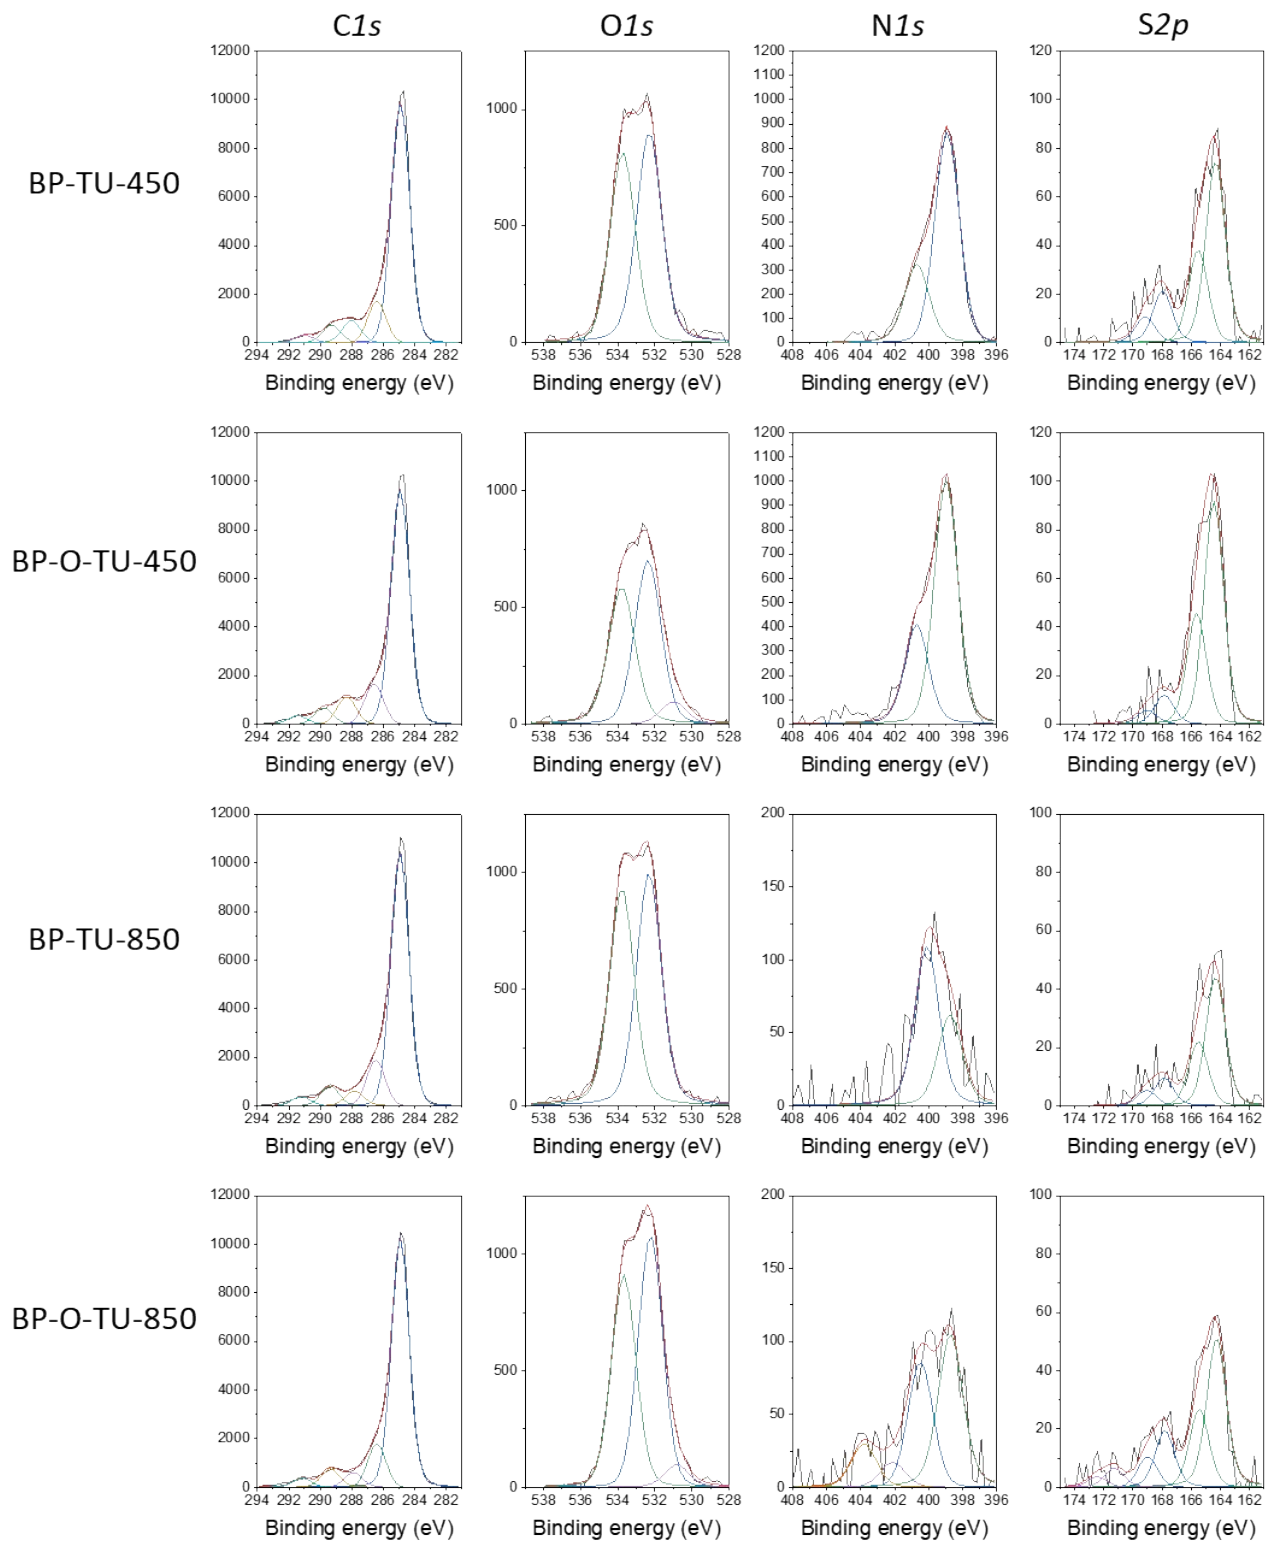

Figure S11. Deconvolution of C 1s, O 1s, N 1s and S 2p for the series of thiourea-modified samples

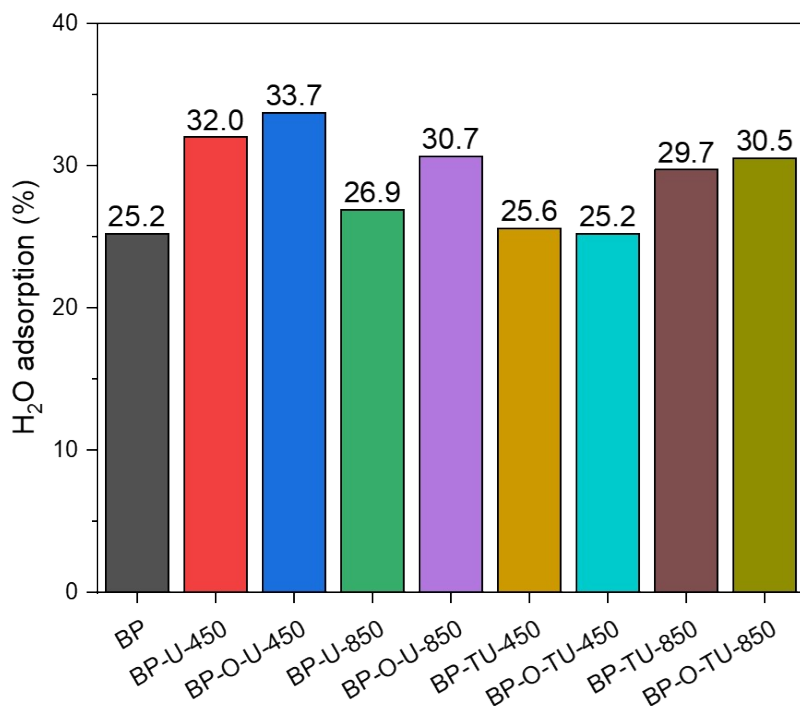

Figure S12. Comparison of the amount of water adsorbed after 4 hours of exposure to saturated vapors.

Table S1. Surface pH, pK<sub>a</sub> values of the groups on the surface and their corresponding amounts (in mmol/g)

| Sample      | pH  | pK <sub>a</sub> |      |      |      |      |      |       | Total groups (mmol/g) |
|-------------|-----|-----------------|------|------|------|------|------|-------|-----------------------|
|             |     | 4-5             | 5-6  | 6-7  | 7-8  | 8-9  | 9-10 | 10-11 |                       |
| BP          | 8.0 |                 | 0.04 | 0.07 | 0.01 | 0.07 |      | 0.22  | 0.41                  |
| BP-U-450    | 6.9 |                 | 0.03 | 0.08 |      | 0.07 |      | 0.24  | 0.42                  |
| BP-O-U-450  | 7.5 | 0.06            |      | 0.13 | 0.04 | 0.08 |      | 0.35  | 0.67                  |
| BP-U-850    | 7.6 |                 |      | 0.10 |      | 0.07 |      | 0.67  | 0.85                  |
| BP-O-U-850  | 7.9 |                 | 0.06 | 0.11 | 0.08 |      | 0.07 | 0.33  | 0.65                  |
| BP-TU-450   | 6.8 |                 | 0.03 | 0.09 | 0.03 | 0.05 |      | 0.22  | 0.42                  |
| BP-O-TU-450 | 6.8 |                 | 0.04 | 0.08 | 0.06 | 0.06 |      | 0.26  | 0.50                  |
| BP-TU-850   | 7.5 |                 | 0.03 | 0.09 |      | 0.07 | 0.03 | 0.25  | 0.47                  |
| BP-O-TU-850 | 7.7 | 0.05            |      | 0.09 |      | 0.11 |      | 0.29  | 0.54                  |

Table S2. Atomic % of the element on the surface (in bold) and the results of the deconvolution of C 1s, O 1s, N 1s and S 2p core energy level spectra (in % contribution).

|                           |                              | BP          | BP-O        | BP-U-450    | BP-O-U-450  | BP-U-850    | BP-O-U-850  | BP-TU-450   | BP-O-TU-450 | BP-TU-850   | BP-O-TU-850 |
|---------------------------|------------------------------|-------------|-------------|-------------|-------------|-------------|-------------|-------------|-------------|-------------|-------------|
| <b>C 1s</b>               |                              | <b>86.3</b> | <b>87.4</b> | <b>86.0</b> | <b>86.8</b> | <b>85.8</b> | <b>93.4</b> | <b>87.6</b> | <b>88.9</b> | <b>92.7</b> | <b>91.2</b> |
| 284.7- 284.9              | C-C                          | 77.0        | 79.7        | 74.7        | 75.8        | 76.9        | 74.0        | 72.5        | 72.1        | 73.7        | 74.1        |
| 286.2 - 286.6             | C-O, C-N                     | 16.0        | 12.0        | 18.0        | 16.4        | 16.4        | 15.3        | 12.3        | 12.0        | 13.0        | 12.4        |
| 287.8 - 288.3             | C=O, N-C=O                   |             |             |             |             |             | 4.7         | 7.3         | 8.3         | 4.7         | 4.5         |
| 289.3 - 289.8             | O-C=O                        | 7.0         | 8.3         | 7.3         | 7.8         | 6.8         | 3.8         | 5.5         | 4.9         | 5.9         | 5.9         |
| 290.6 - 291.4             | $\pi$                        |             |             |             |             |             | 2.2         | 2.5         | 2.7         | 2.7         | 3.0         |
| <b>O 1s</b>               |                              | <b>12.3</b> | <b>12.6</b> | <b>12.3</b> | <b>11.2</b> | <b>12.4</b> | <b>5.2</b>  | <b>5.7</b>  | <b>4.2</b>  | <b>5.9</b>  | <b>7.1</b>  |
| 530.8 - 531.0             |                              |             |             |             |             |             |             |             | 6.8         |             | 5.2         |
| 532.0 - 532.4             | O=C                          | 57.3        | 51.0        | 50.7        | 50.7        | 55.6        | 52.1        | 53.7        | 49.3        | 51.4        | 50.9        |
| 533.4 - 533.9             | O-C                          | 42.7        | 49.0        | 49.3        | 49.3        | 44.4        | 47.9        | 46.3        | 43.8        | 48.6        | 43.8        |
| <b>N 1s</b>               |                              | <b>1.4</b>  | <b>-</b>    | <b>1.7</b>  | <b>2.0</b>  | <b>1.8</b>  | <b>1.5</b>  | <b>6.2</b>  | <b>6.5</b>  | <b>1.2</b>  | <b>1.4</b>  |
| 398.7 - 399.0             | Imine                        | 15.6        |             | 22.5        | 15.1        | 10.5        | 33.5        | 71.0        | 69.5        | 36.4        | 45.9        |
| 399.1-399.5               | Amine, Pyridine              | 73.3        |             | 60.3        | 68.1        | 58.6        |             |             |             |             |             |
| 400.1 - 400.7             | Pyridone, amide              | 11.1        |             | 17.2        | 16.7        | 30.9        | 35.1        | 29.0        | 30.5        | 63.6        | 34.4        |
| 401.5 - 402.1             | Imide                        |             |             |             |             |             | 19.4        |             |             |             | 7.2         |
| 403.8 - 404.1             | Quaternary (N <sup>+</sup> ) |             |             |             |             |             | 12.1        |             |             |             | 12.5        |
| <b>S 2p<sup>3/2</sup></b> |                              |             |             |             |             |             |             | <b>0.5</b>  | <b>0.5</b>  | <b>0.3</b>  | <b>0.2</b>  |
| 164.3 - 164.5             | Thiol, thiophenes            |             |             |             |             |             |             | 77.4        | 88.4        | 81.6        | 66.2        |
| 167.8 - 168.0             | Sulfones Sulfoxides          |             |             |             |             |             |             | 22.6        | 11.7        | 18.4        | 25.0        |
| 171.3                     | Sulfonate                    |             |             |             |             |             |             |             |             |             | 8.8         |
